# Supplementary material for: Assembly of Microparticles to Patterned Trenches Using the Depletion Volume Effect
Source: MDPI journal article supplement (doi:10.3390/mi10070428), 2019-06-28
Supplement: s1 [file s1]

## Assembly of microparticles to patterned trenches using the depletion volume effect

Yaoki Mori, Ryota Kawai, Hiroaki Suzuki\*

Chuo University, Japan

Email: [suzuki@mech.chuo-u.ac.jp](mailto:suzuki@mech.chuo-u.ac.jp)

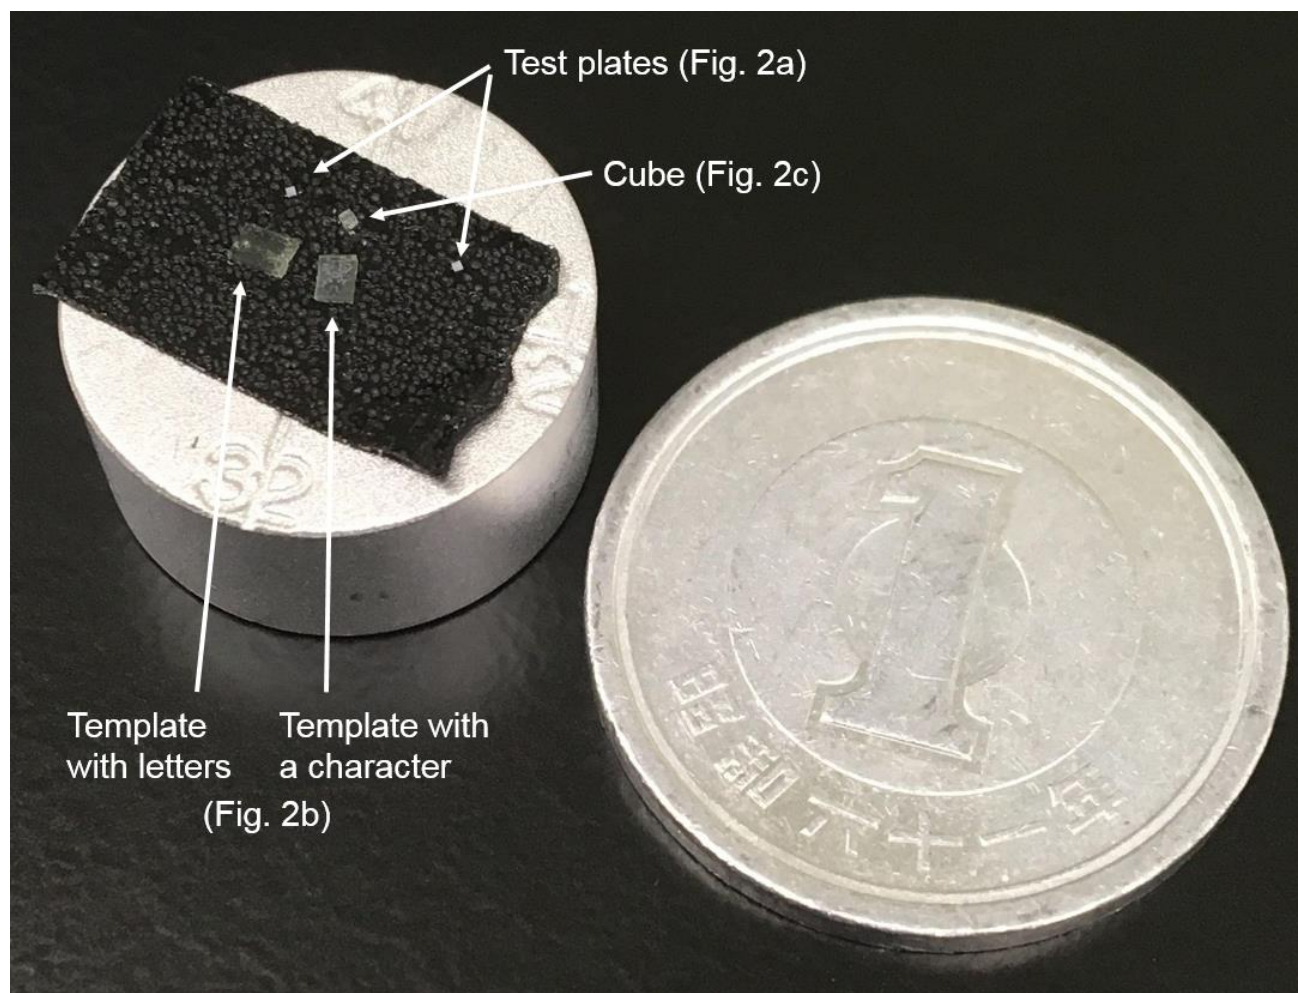

**Figure S1** Comparison of the size of microfabricated templates to a 1-yen coin (20 mm diam.).

1. Fabrication of MPs on a glass substrate by stereolithography.

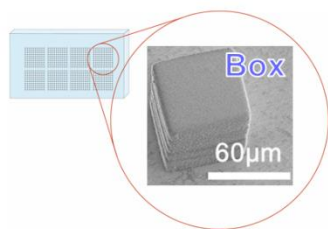

2. Releasing MPs in the ultrasonic bath.

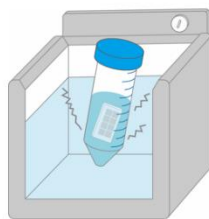

3. Transferring of MPs to a PCR tube and addition of SDS/PEG.

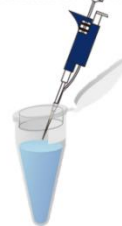

4. Rotational agitation for 30 min with periodical stop and vibration.

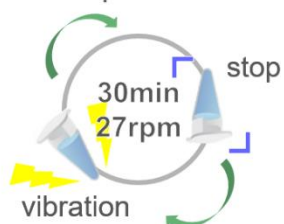

5. Microscope observation.

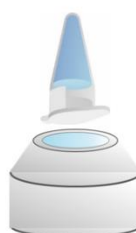

**Figure S2** Schematic illustration of the experimental procedure.

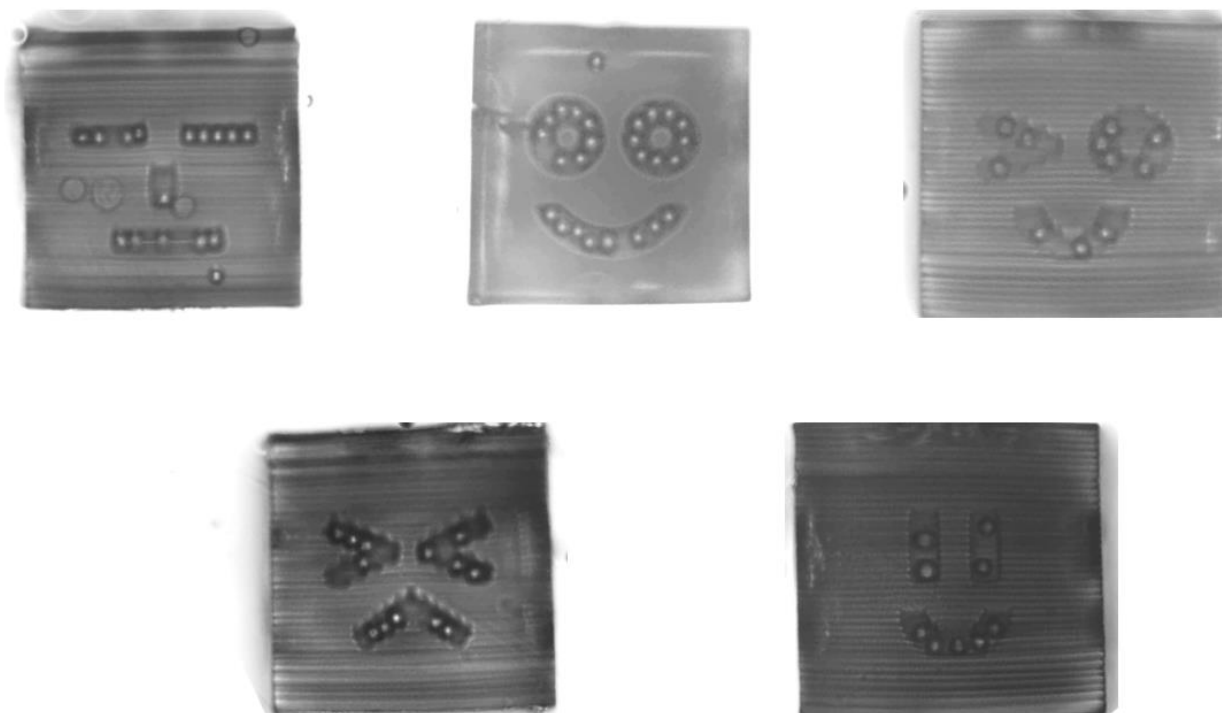

**Figure S3** Assembly of beads to the cubic template with five faces obtained after 1.5h agitation.
